# Supplementary material for: Newborns’ sensitivity to speed changes as a building block for animacy perception
Source: PubMed Central journal article supplement (PMC7803759; doi:10.1038/s41598-020-79451-3), 2021-01-12
Supplement: 41598_2020_79451_MOESM1_ESM.pdf [file 41598_2020_79451_MOESM1_ESM.pdf]

## Supplementary information

“Newborns’ sensitivity to speed changes as a building block for animacy perception”.

Elisa Di Giorgio, Marco Lunghi, Giorgio Vallortigara, & Francesca Simion

### Additional statistical analyses

We conducted additional analyses on the total number of orienting responses that indexed attention-getting mechanisms [1]. Here we reported the results for each experimental condition.

#### *Experiment 1:*

Increased speed stimulus ( $M = 17.7$ ,  $SD = 5.7$ ) vs. constant-speed stimulus ( $M = 17.1$ ,  $SD = 6.9$ ),  $t_{11} = 0.30$ ,  $p = 0.77$ .

#### *Experiment 2:*

Decreased-speed stimulus ( $M = 13.4$ ,  $SD = 4.2$ ) vs. constant-speed stimulus ( $M = 13.8$ ,  $SD = 5.3$ ),  $t_{10} = 0.33$ ,  $p = 0.75$ .

#### *Experiment 3:*

Stimulus that increased and then decreased its speed ( $M = 15.7$ ,  $SD = 6.8$ ) vs. constant-speed stimulus ( $M = 16.3$ ,  $SD = 5.3$ ),  $t_{12} = 0.44$ ,  $p = 0.67$ .

#### *Experiment 4:*

Stimulus that decreased and then increased its speed ( $M = 13.3$ ,  $SD = 4.9$ ) vs. constant-speed stimulus ( $M = 13.8$ ,  $SD = 4.6$ ),  $t_{11} = 0.26$ ,  $p = 0.80$ .

### References

1. Cohen L.B. Attention-getting and attention-holding processes of infant visual preferences. *Child Dev.* **43**, 869–879, DOI: 10.2307/1127638 (1972).
